# Supplementary material
Source: publisher figshare collection journal article supplement (https://sage.figshare.com/ndownloader/files/20718234)
Supplement: Supplementary file 1 [file 20718234]

**Supplementary Figure 2. Interview Guide for Practitioners and Policymakers**

1. **Exploring their position in regards to the organization:**

- Can you describe your responsibilities within the organization?

1. **Exploring the MHPSS program of the organization:**

- Please describe the mental health program in place at your organization.
- Please describe how refugees access your services.
- Please describe the psychosocial interventions provided by your organization (level 3).
- What type of psychotherapies does your organization provide? (level 4)
- How is the referral to the psychiatrist made? (level 4)
- Can you describe the coordination process with other MHPSS organizations?
- Why do you think the organization chose to implement those interventions?
- What do you think of those interventions?

1. **Exploring the perceptions of the Syrians’ mental health problems:**

- Please describe the mental health problems faced by Syrian refugees.
- What do you think are the main causes of their distress?
- How do you feel they cope with these problems?
- What do you think are their main psychosocial and mental health needs?
- What do you think refugees expect from the MHPSS service?
- Can you give me one example of a case that particularly marked your experience?

1. **Exploring the main challenges experienced in their practice:**

What are the main challenges that you face while working with Syrian refugees?
